# Supplementary material
Source: Springer Nature journal article supplement (https://www.springermedizin.de/resource/supplementary/12885_2011_2841_MOESM7_ESM.pdf/9462164)

# PC-3

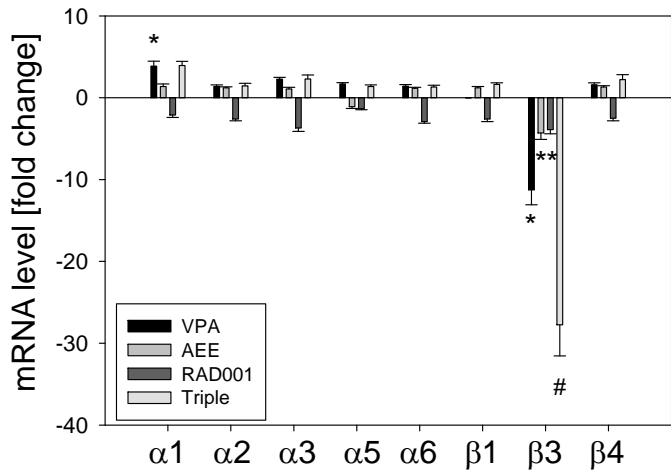

# LNCaP

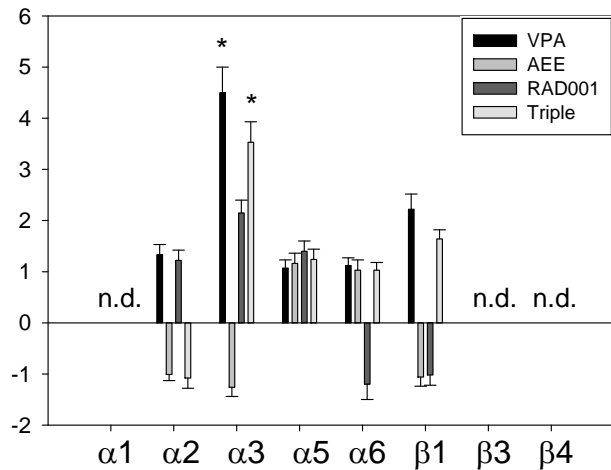

Supplement: MOESM7 [file 9462164]
